# Supplementary material
Source: publisher figshare collection journal article supplement (https://springernature.figshare.com/ndownloader/files/12430916)
Supplement: Supplementary file 1 [file 12430916]

**Appendix**

**Table S1 Mean GeDI item measures (Measure) and standard error (S.E.) by vignette rotation position**

|  | **Position 1** | | **Position 2** | | **Position 3** | | **Position 4** | |
| --- | --- | --- | --- | --- | --- | --- | --- | --- |
| **Item** | **Measure** | **S.E.** | **Measure** | **S.E.** | **Measure** | **S.E.** | **Measure** | **S.E.** |
| 1 | -0.85 | 0.24 | -1.04 | 0.26 | -1.52 | 0.31 | -1.35 | 0.3 |
| 2 | 0.19 | 0.22 | 0.64 | 0.23 | -0.08 | 0.25 | -0.05 | 0.24 |
| 3 | -0.05 | 0.22 | -0.78 | 0.25 | -0.52 | 0.26 | -0.29 | 0.25 |
| 4 | -0.91 | 0.25 | -0.78 | 0.25 | -0.79 | 0.27 | -0.95 | 0.27 |
| 5 | 0.75 | 0.23 | 0.75 | 0.24 | 0.84 | 0.25 | 0.43 | 0.24 |
| 6 | 1.14 | 0.24 | 0.81 | 0.24 | 1.32 | 0.27 | 0.67 | 0.25 |
| 7 | -0.79 | 0.24 | -0.6 | 0.24 | -0.33 | 0.25 | -0.29 | 0.25 |
| 8 | 1.2 | 0.25 | 1.1 | 0.25 | 0.97 | 0.26 | 1.2 | 0.27 |
| 9 | -0.41 | 0.25 | -0.73 | 0.24 | -0.54 | 0.24 | -0.08 | 0.25 |
| 10 | -0.16 | 0.25 | -0.46 | 0.23 | -0.48 | 0.24 | -1.09 | 0.28 |
| 11 | -0.73 | 0.26 | -0.57 | 0.23 | -0.32 | 0.23 | -0.72 | 0.26 |
| 12 | 1.11 | 0.26 | 1.13 | 0.26 | 0.86 | 0.23 | 0.75 | 0.24 |
| 13 | 1.11 | 0.26 | 1.06 | 0.26 | 0.44 | 0.22 | 0.16 | 0.23 |
| 14 | 1.18 | 0.27 | 1.2 | 0.27 | 0.8 | 0.23 | 0.81 | 0.24 |
| 15 | -0.52 | 0.26 | -0.87 | 0.27 | -0.51 | 0.23 | -0.84 | 0.25 |
| 16 | 1.18 | 0.27 | 0.61 | 0.25 | 0.44 | 0.22 | 0.92 | 0.24 |
| 17 | 0.92 | 0.29 | 1.63 | 0.25 | 0.8 | 0.23 | 0.54 | 0.24 |
| 18 | -0.97 | 0.26 | -1.52 | 0.31 | -0.73 | 0.26 | -1.24 | 0.27 |
| 19 | 0.32 | 0.23 | -0.2 | 0.25 | -0.35 | 0.25 | 0.34 | 0.22 |
| 20 | 0.06 | 0.23 | -0.72 | 0.26 | -0.35 | 0.25 | -0.3 | 0.23 |
| 21 | -0.97 | 0.26 | -1.17 | 0.28 | -0.35 | 0.25 | -0.62 | 0.23 |
| 22 | 0.06 | 0.23 | -0.08 | 0.25 | -0.23 | 0.25 | 0.29 | 0.22 |
